# Supplementary material for: Direct inhibition of myosin II effectively blocks glioma invasion in the presence of multiple motogens
Source: PubMed Central journal article supplement — Mol Biol Cell. 2012 Feb 15;23(4):533–42. doi: 10.1091/mbc.E11-01-0039 (PMC3279383; doi:10.1091/mbc.e11-01-0039), 2012-02-15
Supplement: supp_E11-01-0039_CombinedSupMats.pdf [file supp_E11-01-0039_CombinedSupMats.pdf]

## VIDEOS

**Videos 1-7: Images of 300  $\mu\text{m}$  brain tissue sections from the EGFR - expressing model of *gliomatosis cerebri*.**

*Video 1:* Time-lapse images of EGFR-mCherry-expressing cells invading surrounding brain. Images were captured every 3 minutes and displayed at a rate of 30 frames per second.

*Video 2:* Time lapse of EGFR-mCherry-expressing cells in the presence of 0.1 ng/ml EGF. Video conditions as above.

*Video 3:* Time lapse of EGFR-mCherry-expressing cells in the presence of 0.1 ng/ml EGF+ 100 ng/ml PDGF.

*Video 4:* Time lapse of EGFR-mCherry-expressing cells in the presence of 0.1 ng/ml EGF+10 $\mu\text{M}$  Iressa.

*Video 5:* Time lapse of EGFR-mCherry-expressing cells in the presence of 0.1 ng/ml EGF+20 $\mu\text{M}$  blebbistatin.

*Video 6:* Time lapse of EGFR-mCherry-expressing cells in the presence of 0.1 ng/ml EGF+100 ng/ml PDGF+10 $\mu\text{M}$  Iressa.

*Video 7:* Time lapse of EGFR-mCherry-expressing cells in the presence of 0.1 ng/ml EGF+100 ng/ml PDGF+20 $\mu\text{M}$  blebbistatin.

**Videos 8-11: Images of 300  $\mu\text{m}$  brain tissue sections from the EGFR and PDGF co-expressing model of glioblastoma.**

*Video 8:* Two color video of EGFR(+) cells (*red*) and PDGF secreting cells (*green*). No added ligands ("Baseline").

*Video 9:* In the presence of 0.1 ng/ml EGF.

*Video 10:* In the presence of 0.1 ng/ml EGF+10 $\mu$ M Iressa.

*Video 11:* In the presence of 0.1 ng/ml EGF+20 $\mu$ M blebbistatin.
